# Supplementary material
Source: Springer Nature journal article supplement (https://www.springermedizin.de/resource/supplementary/12906_2013_1486_MOESM4_ESM.pdf/9522024)

**A**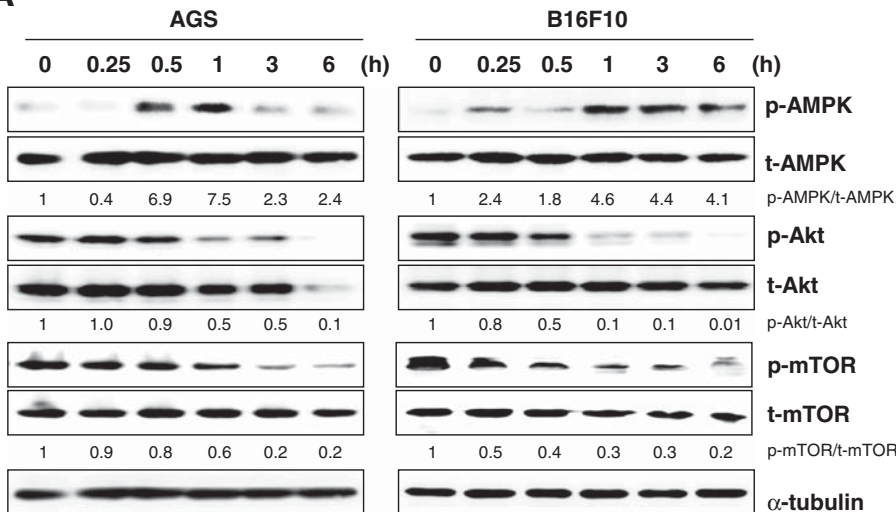**B**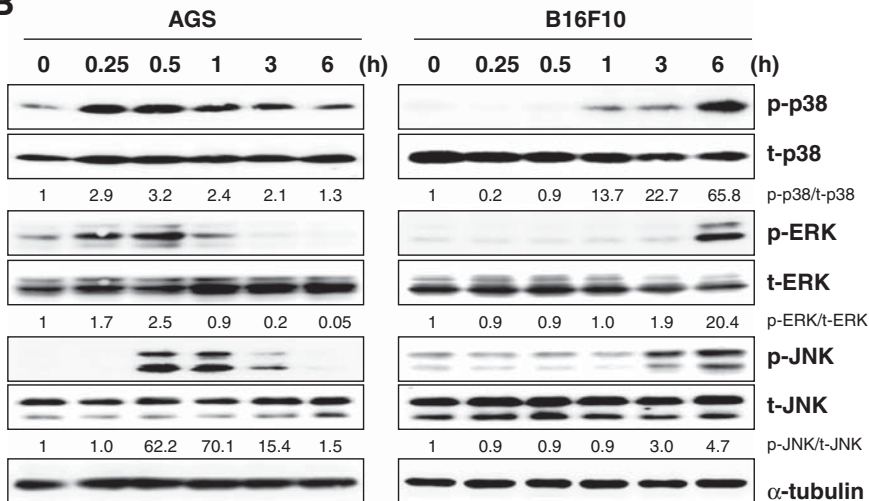

Supplement: MOESM4 [file 9522024]
